# Supplementary material
Source: HighWire-hosted journal article supplement (https://www.annfammed.org/highwire/filestream/26710/field_highwire_adjunct_files/0/Cohen_Supp_App.pdf)
Supplement: Cohen_Supp_App.pdf [file Cohen_Supp_App.pdf]

Supplemental Materials for

The Annals of Family Medicine January 2025, 23 (1) 83; DOI: <https://doi.org/10.1370/afm.240384>

# *Reducing Stigma Through Conversations in Primary Care About Unhealthy Alcohol Use*

*Dawn Bishop, BAS<sup>1</sup>*

*Darla Parsons<sup>1</sup>*

*Gabriela Villalobos, MSW<sup>2</sup>*

*Jennifer Bannon, MS, RN<sup>3</sup>*

*Michelle Rockwell, PhD, RD<sup>4</sup>*

*Alex Krist, MD<sup>2</sup>*

*Daniel E. Jonas, MD, MPH<sup>5</sup>*

*Melinda M. Davis, PhD, MCR<sup>6</sup>*

*Sean Riley, MSc, MA<sup>7</sup>*

*Leslie Brouwer, MS, APRN, FNP-C, RD<sup>7</sup>*

*Theresa Walunas, PhD<sup>8</sup>*

*Abel Kho, MD<sup>8</sup>*

*Hidie Cohen, MEd, MA<sup>9</sup>*

*Tracy McPherson, PhD<sup>9</sup>*

*Amy Rosenfeld, MPH<sup>9</sup>*

*Elizabeth Flanagan, MPH<sup>9</sup>*

<sup>1</sup>Altarum, Ann Arbor, Michigan

<sup>2</sup>Virginia Commonwealth University, Richmond, Virginia

<sup>3</sup>Center for Health Information Partnerships (CHIP), Northwestern University Feinberg School of Medicine, Chicago, Illinois

<sup>4</sup>Virginia Tech Carilion School of Medicine, Roanoke, Virginia

<sup>5</sup>Division of General Internal Medicine and Geriatrics, Department of Internal Medicine, The Ohio State University College of Medicine, Columbus, Ohio

<sup>6</sup>Oregon Health and Science University, Portland, Oregon

<sup>7</sup>The Ohio State University College of Medicine, Columbus, Ohio

<sup>8</sup>Feinberg School of Medicine, Northwestern University, Chicago, Illinois

<sup>9</sup>NORC at the University of Chicago, Chicago, Illinois

**Resources:**

“We Ask Everyone” poster relating UAU screening to other preventive screenings in primary care: [https://attcnetwork.org/wp-content/uploads/2018/11/WeAskEveryone508\\_0.pdf](https://attcnetwork.org/wp-content/uploads/2018/11/WeAskEveryone508_0.pdf)

AHRQ’s EvidenceNOW: Managing Unhealthy Alcohol Use Initiative:  
<https://integrationacademy.ahrq.gov/about/initiatives/alcohol>

**Funding support:**

This project was funded under Contract Number HHSP233201500023I from the Agency for Healthcare Research and Quality (AHRQ), US Department of Health and Human Services. Readers should not interpret any resources or statements in this submission as an official position or endorsement by AHRQ or by the US Department of Health and Human Services.

**Acknowledgments:**

The authors gratefully acknowledge the Agency for Healthcare Research and Quality for their support of this project and article, commitment to improving the management of unhealthy alcohol use in primary care, and many tremendous contributions that support primary care practice transformation. The authors also gratefully acknowledge contributions from the Facilitating Alcohol Screening and Treatment (FAST) – Colorado Team in review and editing.

**Suggested References:**

Fortney, J., Mukherjee, S., Curran, G. *et al.* Factors associated with perceived stigma for alcohol use and treatment among at-risk drinkers. *The Journal of Behavioral Health Services & Research* 31, 418–429 (2004). <https://doi.org/10.1007/BF02287693>

Singh AN, Sanchez V, Kenzie ES, Sullivan E, McCormack JL, Hiebert Larson J, Robbins A, Weekley T, Hatch BA, Dickinson C, Elder NC, Muench JP, Davis MM. Improving screening, treatment, and intervention for unhealthy alcohol use in primary care through clinic, practice-based research network, and health plan partnerships: Protocol of the ANTECEDENT study. *PLoS One*. 2022 Jun 28;17(6): e0269635. doi: 10.1371/journal.pone.0269635.

Davis MM, Coury J, Sanchez V, Kenzie ES, Barnes C, Hiebert Larson J, McCormack JL, Durr R, Weekley T, Robbins A, Hatch BA. Improving Screening, Brief Intervention and Referral to Treatment for Unhealthy Alcohol Use in Rural and Low-Resourced Primary Care Clinics. BMC Health Service Research. In review.

Kenzie E, Campbell J, Seater M, Singh A, Robbins A, Davis M. Goal alignment and unintended consequences of accountable care: Partnerships toward quality metrics from the perspective of Oregon's Medicaid coordinated care organizations. *BMC Primary Care*. In review.

### **Grantee websites:**

Visit the 6 grantee project websites below for publicly available videos, pamphlets, trainings and other materials used to reduce stigma around having conversations with patients around UAU.

1. Stop Unhealthy Alcohol Use Now (STUN) – North Carolina:

<http://stunalcoholusenow.org/primaryCareResources.html>

2. Michigan Sustained Patient-centered Alcohol-Related Care (MI-SPARC) – Michigan:

<https://michigansparc.org/>

3. Unhealthy Alcohol Use – Virginia: <https://uauvirginia.squarespace.com/>

4. Facilitating Alcohol Screening and Treatment (FAST) – Colorado:

- <https://medschool.cuanschutz.edu/practice-innovation-program/previous-initiatives/facilitating-alcohol-screening-treatment/about>
- E-Learning Modules - [https://cuelearning.org/focus\\_areas/facilitating-alcohol-screening-and-treatment-fast/](https://cuelearning.org/focus_areas/facilitating-alcohol-screening-and-treatment-fast/)

5. ANTECEDENT (pArtNerships To Enhance alCohol scrEening, treatment, and intErveNTion) – Oregon: <https://www.sbirtoregon.org/>

6. Intervention in Small Primary care practices to Implement Reduction in unhealthy alcohol use (INSPIRE) – Illinois/Wisconsin:

<https://www.feinberg.northwestern.edu/sites/chip/our-projects/projects/inspire.html>
